# Supplementary material for: Risk factors for SARS-CoV-2 infection: A test-negative case-control study with additional population controls
Source: bioRxiv or medRxiv preprint supplement (doi:10.1101/2023.03.15.23287300), 2023-03-19
Supplement: Supplementary file [file media-1.pdf]

**Supplementary table S1: Questionnaire**

|                                                                |                                                 |                                               |                  |                       |
|----------------------------------------------------------------|-------------------------------------------------|-----------------------------------------------|------------------|-----------------------|
| <b>Questionnaire</b>                                           |                                                 |                                               |                  |                       |
| <b>Education</b>                                               |                                                 |                                               |                  |                       |
| What is your highest education?                                | Primary + secondary school                      | High school + certificate?                    | University       |                       |
| <b>Smoking habits</b>                                          |                                                 |                                               |                  |                       |
| Do you smoke?                                                  | Yes                                             | No                                            | If yes, daily?   | If yes, occasionally? |
| Are you a past smoker?                                         | Yes                                             | No                                            |                  |                       |
| <b>Comorbidities</b>                                           |                                                 |                                               |                  |                       |
| Asthma and chronic obstructive pulmonary disease (COPD)        | Has a physician ever diagnosed you with asthma? | Has a physician ever diagnosed you with COPD? |                  |                       |
| Do you have the following diseases?                            | Diabetes                                        | High blood pressure                           |                  |                       |
| <b>Exercise</b>                                                |                                                 |                                               |                  |                       |
| How often do you exercise?                                     | Once a week                                     | 2-4 times a week                              | 4-7 times a week |                       |
| <b>Environmental exposure</b>                                  |                                                 |                                               |                  |                       |
| Is your bedroom window nearer than 20 meter from a busy road   | Yes, little trafficked road                     | Yes, moderate/busy trafficked road            |                  |                       |
| <b>Wood heating</b>                                            |                                                 |                                               |                  |                       |
| How often do you use wood heating in your house during winter? | No use                                          | Seldom                                        | 2-3 times a week | Daily                 |
