# Supplementary material for: Risk factors for SARS-CoV-2 infection: A test-negative case-control study with additional population controls
Source: bioRxiv or medRxiv preprint supplement (doi:10.1101/2023.03.15.23287300), 2023-03-19
Supplement: Supplementary file [file media-2.pdf]

**Table S2** Subgroup analysis of cases and controls (aged 18–55 years) and population control group (aged 21–55 years). Characteristics and comorbidities for the PCR+ cases, PCR- controls at the baseline 3–5 months after PCR test and the population control group data from pre-existing Telemark study dataset from 2018.

| Characteristics                                   | PCR+ cases       | PCR- controls    | Population controls |
|---------------------------------------------------|------------------|------------------|---------------------|
|                                                   | N=286 (%)        | N=502            | N=14509             |
| <b>Demographics</b>                               | Ages 18–55 years | Ages 18–55 years | Ages 21–55 years    |
| <b>Age in years, mean (SD), median</b>            | 40.2 (9.8), 41.0 | 39.8 (9.2), 40.0 | 42.6 (9.7), 45.0    |
| <b>Age categories</b>                             |                  |                  |                     |
| <b>16–30</b>                                      | 59 (20.6)        | 92 (18.3)        | 2392 (16.5)         |
| <b>31–40</b>                                      | 78 (27.3)        | 175 (34.9)       | 2904 (20.0)         |
| <b>41–50</b>                                      | 94 (32.9)        | 159 (31.7)       | 5360 (36.9)         |
| <b>51–60</b>                                      | 55 (19.2)        | 76 (15.1)        | 3853 (26.6)         |
| <b>&gt; 60</b>                                    | *                | *                | *                   |
| <b>Sex, males</b>                                 | 132 (46.2)       | 162 (32.3)       | 6142 (42.3)         |
| <b>females</b>                                    | 154 (53.8)       | 340 (67.7)       | 8367 (57.7)         |
| <b>BMI in kg/m<sup>2</sup>, mean (SD), median</b> | 26.2 (4.6), 25.5 | 26.7 (5.8), 25.5 | 26.3 (4.9), 25.6    |
| <b>BMI category, kg/m<sup>2</sup></b>             |                  |                  |                     |
| <b>18.5–24.9</b>                                  | 118 (41.3)       | 198 (39.4)       | 6140 (42.3)         |
| <b>&lt; 18.5</b>                                  | 4 (1.4)          | 10 (2.0)         | 161 (1.1)           |
| <b>25–29.9</b>                                    | 109 (38.1)       | 176 (35.1)       | 5255 (36.2)         |
| <b>30–39.9</b>                                    | 45 (15.7)        | 105 (20.9)       | 2623 (18.1)         |
| <b>Missing data</b>                               | 10 (3.5)         | 13 (2.6)         | 330 (2.3)           |
| <b>Education</b>                                  |                  |                  |                     |
| <b>Primary + secondary school</b>                 | 22 (7.7)         | 46 (9.2)         | 1246 (8.6)          |
| <b>High school + certificate</b>                  | 104 (36.4)       | 143 (28.5)       | 5146 (35.5)         |
| <b>University</b>                                 | 152 (53.1)       | 307 (61.2)       | 7851 (54.1)         |
| <b>Missing data</b>                               | 8 (2.8)          | 6 (1.29)         | 266 (1.8)           |
| <b>Smoking</b>                                    |                  |                  |                     |
| <b>Never smoker</b>                               | 173 (60.5)       | 249 (49.6)       | 8359 (57.6)         |
| <b>Past smoker</b>                                | 64 (22.4)        | 134 (26.7)       | 3667 (25.3)         |
| <b>Occasional and daily smoker</b>                | 25 (8.7)         | 66 (13.1)        | 2483 (17.1)         |
| <b>Missing data</b>                               | 24 (8.4)         | 53 (10.6)        | 0 (0)               |
| <b>Comorbidities</b>                              |                  |                  |                     |
| <b>Asthma</b>                                     |                  |                  |                     |
| <b>Yes</b>                                        | 46 (16.1)        | 94 (18.7)        | 1760 (12.1)         |
| <b>No</b>                                         | 225 (78.7)       | 389 (77.5)       | 12749 (87.9)        |
| <b>Missing data</b>                               | 15 (5.2)         | 19 (3.8)         | 0 (0)               |
| <b>COPD</b>                                       |                  |                  |                     |
| <b>Yes</b>                                        | 2 (0.7)          | 7 (1.4)          | 155 (1.1)           |
| <b>No</b>                                         | 269 (94.1)       | 476 (94.8)       | 14354 (98.9)        |
| <b>Missing data</b>                               | 15 (5.2)         | 19 (3.8)         | 0 (0)               |
| <b>Diabetes</b>                                   |                  |                  |                     |

|                                    |            |            |              |
|------------------------------------|------------|------------|--------------|
| <b>Yes</b>                         | 9 (3.1)    | 13 (2.6)   | 370 (2.6)    |
| <b>No</b>                          | 269 (94.1) | 486 (96.8) | 14139 (97.4) |
| <b>Missing data</b>                | 8 (2.8)    | 3 (0.6)    | 0 (0)        |
| <b>Hypertension</b>                |            |            |              |
| <b>Yes</b>                         | 12 (4.2)   | 21 (4.2)   | 1369 (9.4)   |
| <b>No</b>                          | 266 (93.0) | 478 (95.2) | 13140 (90.6) |
| <b>Missing data</b>                | 8 (2.8)    | 3 (0.6)    | 0 (0)        |
| <b>Exercise†</b>                   |            |            |              |
| <b>&lt; once a week</b>            | 40 (14.0)  | 98 (19.5)  | 2699 (18.6)  |
| <b>Once a week</b>                 | 66 (23.1)  | 97 (19.3)  | 2416 (16.7)  |
| <b>2–3 times a week</b>            | 102 (35.7) | 189 (37.6) | 4993 (34.4)  |
| <b>4–7 times a week</b>            | 64 (22.4)  | 103 (20.5) | 2443 (16.8)  |
| <b>Missing data</b>                | 14 (4.9)   | 15 (3.0)   | 1958 (13.5)  |
| <b>Bedroom window‡</b>             |            |            |              |
| <b>No</b>                          | 169 (59.1) | 297 (59.2) | 8226 (56.7)  |
| <b>Yes, little traffic</b>         | 85 (29.7)  | 157 (31.3) | 4443 (30.6)  |
| <b>Yes, moderate/busy road</b>     | 21 (7.3)   | 40 (8.0)   | 1121 (7.7)   |
| <b>Missing data</b>                | 11 (3.8)   | 8 (1.6)    | 719 (5.0)    |
| <b>Wood heating in the season§</b> |            |            |              |
| <b>No</b>                          | 104 (36.4) | 156 (31.1) | 7551 (52.0)  |
| <b>Seldom</b>                      | 70 (24.5)  | 124 (24.7) | 1524 (10.5)  |
| <b>2–3 times a week</b>            | 56 (19.6)  | 103 (20.5) | 2943 (20.3)  |
| <b>4-7 times a week</b>            | 56 (19.6)  | 119 (23.7) | 2491 (17.2)  |
| <b>Missing data</b>                | 0 (0)      | 0 (0)      | 0 (0)        |

BMI, body mass index; COPD, chronic obstructive pulmonary disease.

\*Data not available.

†How often do you exercise?

‡Is your bedroom window closer than 20 m from a busy road?

§Do you have wood heating in your house during winter?
