# Supplementary material for: Risk factors for SARS-CoV-2 infection: A test-negative case-control study with additional population controls
Source: bioRxiv or medRxiv preprint supplement (doi:10.1101/2023.03.15.23287300), 2023-03-19
Supplement: Supplementary file [file media-3.pdf]

**Table S3** The univariate and multivariate regression analysis for a subgroup of PCR- controls vs population control group from the Telemark study. Age groups 18–55 years are included for PCR- controls and 21–55 years for the population control group.

| Demographics                               | PCR- controls vs population controls, univariate analysis adjusted for age and sex (Aged 18–55) |       |       |         | PCR- controls vs population controls, multivariate analysis adjusted for age and sex (Aged 18–55) |       |       |         |
|--------------------------------------------|-------------------------------------------------------------------------------------------------|-------|-------|---------|---------------------------------------------------------------------------------------------------|-------|-------|---------|
|                                            | OR                                                                                              | 2.5%  | 97.5% | p-value | OR                                                                                                | 2.5%  | 97.5% | p-value |
| <b>Age categories</b>                      |                                                                                                 |       |       |         |                                                                                                   |       |       |         |
| 16–30 (reference)                          |                                                                                                 |       |       |         | 1.22                                                                                              | 0.92  | 1.62  | 0.17    |
| 31–40                                      | 1.58                                                                                            | 1.22  | 2.05  | < 0.001 | 0.50                                                                                              | 0.37  | 0.67  | < 0.001 |
| 41–50                                      | 0.79                                                                                            | 0.61  | 1.02  | 0.07    | 0.67                                                                                              | 0.50  | 0.92  | 0.006   |
| 51–60                                      | 1.01                                                                                            | 0.78  | 1.33  | 0.92    | *                                                                                                 |       |       |         |
| > 60                                       | *                                                                                               |       |       |         |                                                                                                   |       |       |         |
| <b>Sex</b>                                 |                                                                                                 |       |       |         |                                                                                                   |       |       |         |
| Female (reference)                         |                                                                                                 |       |       |         |                                                                                                   |       |       |         |
| Male                                       | 0.67                                                                                            | 0.56  | 0.80  | <0.001  | 0.62                                                                                              | 0.51  | 0.76  | < 0.001 |
| <b>BMI in kg/m<sup>2</sup> in category</b> |                                                                                                 |       |       |         |                                                                                                   |       |       |         |
| 18.5–24.9 (reference)                      |                                                                                                 |       |       |         |                                                                                                   |       |       |         |
| < 18.5                                     | 1.48                                                                                            | 0.72  | 2.70  | 0.24    | 2.02                                                                                              | 0.96  | 3.82  | 0.04    |
| 25–29.9                                    | 1.22                                                                                            | 1.00  | 1.49  | 0.05    | 1.17                                                                                              | 0.94  | 1.46  | 0.16    |
| > 30                                       | 1.40                                                                                            | 1.11  | 1.76  | 0.004   | 1.51                                                                                              | 1.16  | 1.96  | 0.002   |
| <b>Education</b>                           |                                                                                                 |       |       |         |                                                                                                   |       |       |         |
| Primary + secondary school (reference)     | 1                                                                                               |       |       |         |                                                                                                   |       |       |         |
| High school + certificate                  | 0.71                                                                                            | 0.53  | 0.98  | 0.03    | 0.61                                                                                              | 0.423 | 0.87  | 0.006   |
| University                                 | 0.85                                                                                            | 0.64  | 1.15  | 0.27    | 0.78                                                                                              | 0.56  | 1.11  | 0.16    |
| <b>Smoking</b>                             |                                                                                                 |       |       |         |                                                                                                   |       |       |         |
| Never smoker (reference)                   | 1                                                                                               |       |       |         |                                                                                                   |       |       |         |
| Past smoker                                | 1.43                                                                                            | 1.17  | 1.76  | < 0.001 | 1.40                                                                                              | 1.13  | 1.74  | 0.002   |
| Daily + occasional smoker                  | 0.97                                                                                            | 0.74  | 1.26  | 0.84    | 1.07                                                                                              | 0.80  | 1.40  | 0.66    |
| <b>Comorbidities</b>                       |                                                                                                 |       |       |         |                                                                                                   |       |       |         |
| Asthma No (reference)                      | 1                                                                                               |       |       |         |                                                                                                   |       |       |         |
| Yes                                        | 0.977                                                                                           | 0.811 | 1.174 | 0.804   | 0.815                                                                                             | 0.555 | 1.162 | 0.277   |
| Diabetes No (reference)                    | 1                                                                                               |       |       |         |                                                                                                   |       |       |         |
| Yes                                        | 1.10                                                                                            | 0.61  | 1.82  | 0.74    | 1.25                                                                                              | 0.68  | 2.13  | 0.44    |
| COPD No (reference)                        | 1                                                                                               |       |       |         |                                                                                                   |       |       |         |
| Yes                                        | 1.97                                                                                            | 0.96  | 3.6   | 0.04    | 1.43                                                                                              | 0.59  | 2.95  | 0.38    |
| Hypertension No (reference)                | 1                                                                                               |       |       |         |                                                                                                   |       |       |         |
| Yes                                        | 0.71                                                                                            | 0.49  | 1.00  | 0.06    | 0.52                                                                                              | 0.34  | 0.78  | 0.002   |
| <b>Exercise†</b>                           |                                                                                                 |       |       |         |                                                                                                   |       |       |         |
| Never (reference)                          | 1                                                                                               |       |       |         |                                                                                                   |       |       |         |
| Once a week                                | 1.11                                                                                            | 0.85  | 1.46  | 0.44    | 1.15                                                                                              | 0.85  | 1.55  | 0.37    |
| 2–3 times a week                           | 1.08                                                                                            | 0.85  | 1.37  | 0.55    | 1.12                                                                                              | 0.87  | 1.47  | 0.38    |
| 4–7 times a week                           | 1.22                                                                                            | 0.93  | 1.60  | 0.15    | 1.33                                                                                              | 0.99  | 1.80  | 0.061   |
| <b>Bedroom window‡</b>                     |                                                                                                 |       |       |         | 1.324                                                                                             | 0.543 | 2.751 | 0.491   |

|                                    |      |      |      |         |       |       |       |         |
|------------------------------------|------|------|------|---------|-------|-------|-------|---------|
| No (reference)                     | 1    |      |      |         |       |       |       |         |
| Yes, little traffic                | 0.98 | 0.81 | 1.17 | 0.80    | 0.97  | 0.79  | 1.18  | 0.75    |
| Yes, moderate/busy road            | 0.89 | 0.63 | 1.21 | 0.47    | 0.526 | 0.342 | 0.778 | 0.002   |
| <b>Wood heating in the season§</b> |      |      |      |         |       |       |       |         |
| No (reference)                     | 1    |      |      |         |       |       |       |         |
| Seldom                             | 4.00 | 3.17 | 5.03 | < 0.001 | 1.68  | 1.31  | 2.13  | < 0.001 |
| 2–3 times a week                   | 1.67 | 1.31 | 2.12 | < 0.001 | 2.00  | 1.53  | 2.60  | < 0.001 |
| Daily                              | 2.49 | 1.98 | 3.13 | < 0.001 | 3.55  | 2.75  | 4.57  | < 0.001 |

OR, odds ratio; BMI, body mass index; COPD, chronic obstructive pulmonary disease.

\*Data not available.

†How often do you exercise?

‡Is your bedroom window closer than 20 m from a busy road?

§How often do you use wood heating in your house during winter?
